**Table 1—Système International (SI) units for plasma, serum, or blood concentrations**

| Measurement                    | Conventional unit | Conversion factor | SI unit | Significant digits | Suggested minimum increments |
|--------------------------------|-------------------|-------------------|---------|--------------------|------------------------------|
| Acetoacetate                   | mg/dl             | 97.95             | μmol/l  | XXO                | 10 μmol/l                    |
| Acetone                        | mg/dl             | 172.2             | μmol/l  | XXO                | 10 μmol/l                    |
| Adrenocorticotropin            | pg/ml             | 0.2202            | pmol/l  | XX                 | 1 pmol/l                     |
| Aldosterone                    | ng/dl             | 27.74             | pmol/l  | XXO                | 10 pmol/l                    |
| Amino acids                    |                   |                   |         |                    |                              |
| Alanine                        | mg/dl             | 112.2             | μmol/l  | XXX                | 5 μmol/l                     |
| α-Aminobutyric acid            | mg/dl             | 96.97             | μmol/l  | XXX                | 5 μmol/l                     |
| Arginine                       | mg/dl             | 57.40             | μmol/l  | XXX                | 5 μmol/l                     |
| Asparagine                     | mg/dl             | 75.69             | μmol/l  | XXX                | 5 μmol/l                     |
| Aspartic acid                  | mg/dl             | 75.13             | μmol/l  |                    | 5 μmol/l                     |
| Citrulline                     | mg/dl             | 57.08             | μmol/l  | XXX                | 5 μmol/l                     |
| Cystine                        | mg/dl             | 41.61             | μmol/l  | XXX                | 5 μmol/l                     |
| Glutamic acid                  | mg/dl             | 67.97             | μmol/l  | XXX                | 5 μmol/l                     |
| Glutamine                      | mg/dl             | 68.42             | μmol/l  | XXX                | 5 μmol/l                     |
| Glycine                        | mg/dl             | 133.2             | μmol/l  | XXX                | 5 μmol/l                     |
| Histidine                      | mg/dl             | 64.45             | μmol/l  | XXX                | 5 μmol/l                     |
| Hydroxyproline                 | mg/dl             | 76.26             | μmol/l  | XXX                | 5 μmol/l                     |
| Isoleucine                     | mg/dl             | 76.24             | μmol/l  | XXX                | 5 μmol/l                     |
| Leucine                        | mg/dl             | 76.24             | μmol/l  | XXX                | 5 μmol/l                     |
| Lysine                         | mg/dl             | 68.40             | μmol/l  | XXX                | 5 μmol/l                     |
| Methionine                     | mg/dl             | 67.02             | μmol/l  | XXX                | 5 μmol/l                     |
| Ornithine                      | mg/dl             | 75.67             | μmol/l  | XXX                | 5 μmol/l                     |
| Phenylalanine                  | mg/dl             | 60.54             | μmol/l  | XXX                | 5 μmol/l                     |
| Proline                        | mg/dl             | 86.86             | μmol/l  | XXX                | 5 μmol/l                     |
| Serine                         | mg/dl             | 95.16             | μmol/l  | XXX                | 5 μmol/l                     |
| Taurine                        | mg/dl             | 79.91             | μmol/l  | XXX                | 5 μmol/l                     |
| Threonine                      | mg/dl             | 83.95             | μmol/l  | XXX                | 5 μmol/l                     |
| Tryptophan                     | mg/dl             | 48.97             | μmol/l  | XXX                | 5 μmol/l                     |
| Tyrosine                       | mg/dl             | 55.19             | μmol/l  | XXX                | 5 μmol/l                     |
| Valine                         | mg/dl             | 85.36             | μmol/l  | XXX                | 5 μmol/l                     |
| Amino acid nitrogen            | mg/dl             | 0.7139            | mmol/l  | X.X                | 0.1 mmol/l                   |
| Amylase                        | U/l               | 1.0               | U/l     | XXO                | 10 U/l                       |
| Androstenedione                | μg/l              | 3.492             | nmol/l  | XX.X               | 0.5 nmol/l                   |
| Calcitonin                     | pg/ml             | 1.0               | ng/l    | XXO                | 10 ng/l                      |
| Calcium                        | mg/dl             | 0.2495            | mmol/l  | X.XX               | 0.02 mmol/l                  |
| Calcium ion                    | meq/l             | 0.500             | mmol/l  | X.XX               | 0.01 mmol/l                  |
| Carbon dioxide content         | meq/l             | 1.00              | nmol/l  | XX                 | 1 mmol/l                     |
| Cholesterol                    | mg/dl             | 0.02586           | mmol/l  | X.XX               | 0.05 mmol/l                  |
| Citrate (as citric acid)       | mg/dl             | 52.05             | μmol/l  | XXX                | 5 μmol/l                     |
| Cortisol                       | μg/dl             | 27.59             | nmol/l  | XXO                | 10 nmol/l                    |
| C-peptide                      | ng/ml             | 0.331             | nmol/l  | X.XX               | 0.01 nmol/l                  |
| Creatinine                     | mg/dl             | 88.40             | μmol/l  | XXO                | 10 μmol/l                    |
| Creatinine clearance           | ml/min            | 0.01667           | ml/s    | X.XX               | 0.02 ml/s                    |
| cyclic AMP                     | μg/l              | 3.038             | nmol/l  | XXX                | 1 nmol/l                     |
| cyclic GMP                     | μg/l              | 2.897             | nmol/l  | XX.X               | 0.1 nmol/l                   |
| Dehydroepiandrosterone         | μg/l              | 3.467             | nmol/l  | XX.X               | 0.2 nmol/l                   |
| Dehydroepiandrosterone sulfate | ng/ml             | 0.002714          | μmol/l  | XX.X               | 0.1 μmol/l                   |
| 11-Deoxycortisol               | μg/dl             | 28.86             | nmol/l  | XXO                | 10 nmol/l                    |
| Epinephrine                    | pg/ml             | 5.458             | pmol/l  | XXO                | 10 pmol/l                    |
| Estradiol                      | pg/ml             | 3.671             | pmol/l  | XXX                | 1 pmol/l                     |

Downloaded from <http://ada.silverchair.com/care/article-pdf/18/11/1524/443404/18-11-1524.pdf> by guest on 18 April 2024

Table 1—Continued

| Measurement                                  | Conventional unit                       | Conversion factor | SI unit                                | Significant digits | Suggested minimum increments                |
|----------------------------------------------|-----------------------------------------|-------------------|----------------------------------------|--------------------|---------------------------------------------|
| Estrone                                      | pg/ml                                   | 3.699             | pmol/l                                 | XXX                | 5 pmol/l                                    |
| Fatty acids, nonesterified                   | mg/dl                                   | 0.01              | g/l                                    | X.XX               | 0.01 g/l                                    |
| Follicle-stimulating hormone                 | mIU/ml                                  | 1.00              | IU/l                                   | XX                 | 1 IU/l                                      |
| Fructose                                     | mg/dl                                   | 0.05551           | mmol/l                                 | X.XX               | 0.1 mmol/l                                  |
| Galactose                                    | mg/dl                                   | 0.05551           | mmol/l                                 | X.XX               | 0.1 mmol/l                                  |
| Gases                                        |                                         |                   |                                        |                    |                                             |
| PO <sub>2</sub>                              | mmHg                                    | 0.1333            | kPa                                    | XX.X               | 0.1 kPa                                     |
| PCO <sub>2</sub>                             | mmHg                                    | 0.1333            | kPa                                    | X.X                | 0.1 kPa                                     |
| Gastrin                                      | pg/ml                                   | 1.0               | ng/l                                   | XXO                | 10 ng/l                                     |
| Gastroinhibitory polypeptide                 | pg/ml                                   | 0.201             | pmol/l                                 | XXO                | 10 pmol/l                                   |
| Glucagon                                     | pg/ml                                   | 1.0               | ng/l                                   | XXO                | 10 ng/l                                     |
| Glucose                                      | mg/dl                                   | 0.05551           | mmol/l                                 | XX.X               | 0.1 mmol/l                                  |
| Glycerol, free                               | mg/dl                                   | 0.1086            | mmol/l                                 | X.XX               | 0.01 mmol/l                                 |
| Growth hormone                               | ng/ml                                   | 1.0               | μg/l                                   | XX.X               | 0.5 μg/l                                    |
| β-Hydroxybutyrate (as β-hydroxybutyric acid) | mg/dl                                   | 96.05             | μmol/l                                 | XXO                | 10 μmol/l                                   |
| 17α-Hydroxyprogesterone                      | μg/l                                    | 3.026             | nmol/l                                 | XX.X               | 0.5 nmol/l                                  |
| Insulin                                      | μU/ml                                   | 6.0               | pmol/l                                 | XXX                | 5 pmol/l                                    |
| Lactate (as lactic acid)                     | mEq/l                                   | 1.0               | mmol/l                                 | X.X                | 0.1 mmol/l                                  |
| Lipase                                       | U/l                                     | 1.0               | U/l                                    | XXX                | 1 U/l                                       |
| Lipoproteins                                 |                                         |                   |                                        | X.XX               |                                             |
| LDL (as cholesterol)                         | mg/dl                                   | 0.02586           | mmol/l                                 | X.XX               | 0.05 mmol/l                                 |
| HDL (as cholesterol)                         | mg/dl                                   | 0.02586           | mmol/l                                 | XXX                | 0.05 mmol/l                                 |
| Luteinizing hormone                          | mIU/ml                                  | 1.0               | IU/l                                   | X.XX               | 1 IU/l                                      |
| Norepinephrine                               | pg/ml                                   | 0.005911          | nmol/l                                 | XXX                | 0.01 nmol/l                                 |
| Osmolality                                   | mOsm/kg                                 | 1.0               | mmol/kg                                | XX                 | 1 mmol/kg                                   |
| Pancreatic polypeptide                       | pg/ml                                   | 0.239             | pmol/l                                 | X.XX               | 1 pmol/l                                    |
| Phosphate (as inorganic phosphorus)          | mg/dl                                   | 0.3229            | mmol/l                                 | X.XX               | 0.05 mmol/l                                 |
| Phospholipid phosphorus                      | mg/dl                                   | 0.3229            | mmol/l                                 | XX                 | 0.05 mmol/l                                 |
| Progesterone                                 | ng/ml                                   | 3.180             | nmol/l                                 | XX                 | 2 nmol/l                                    |
| Prolactin                                    | ng/ml                                   | 1.0               | μg/l                                   | XX                 | 1 μg/l                                      |
| Protein, total                               | g/dl                                    | 10.0              | g/l                                    | XX                 | 1 g/l                                       |
| Pyruvate (as pyruvic acid)                   | mg/dl                                   | 113.6             | μmol/l                                 | XXX                | 1 μmol/l                                    |
| Renin                                        | ng · ml <sup>-1</sup> · h <sup>-1</sup> | 0.2778            | ng · L <sup>-1</sup> · s <sup>-1</sup> | X.XX               | 0.02 ng · L <sup>-1</sup> · s <sup>-1</sup> |
| Serotonin                                    | μg/dl                                   | 0.05675           | μmol/l                                 | X.XX               | 0.05 μmol/l                                 |
| Somatostatin                                 | pg/ml                                   | 0.611             | pmol/l                                 | XX                 | 1 pmol/l                                    |
| Testosterone                                 | ng/ml                                   | 3.467             | nmol/l                                 | XX.X               | 0.5 nmol/l                                  |
| Thyroid-stimulating hormone                  | μU/dl                                   | 1.0               | mU/l                                   | X.X                | 0.1 mU/l                                    |
| Thyroxine                                    | μg/dl                                   | 12.87             | nmol/l                                 | XXX                | 1 nmol/l                                    |
| Triiodothyronine                             | ng/dl                                   | 0.01536           | nmol/l                                 | X.X                | 0.1 nmol/l                                  |
| Urea nitrogen                                | mg/dl                                   | 0.3570            | mmol/l                                 | X.X                | 0.5 mmol/l                                  |
| Vasoactive intestinal polypeptide            | pg/ml                                   | 0.331             | pmol/l                                 | X.X                | 1 pmol/l                                    |

Largely from Young DS: *Ann Intern Med* 106:114–29, 1987. For insulin see Volund A, Brange J, Drejer K, Jensen I, Markussen J, Ribøl V, Sørensen AR, Schlichtkrull J: In vitro and in vivo potency of insulin analogues designed for clinical use. *Diabetic Med* 8:839–47, 1991.
